# Supplementary material
Source: PubMed Central journal article supplement (PMC6449150)
Supplement: NIHMS1007772-supplement-Supplemental_Materials.pdf [file NIHMS1007772-supplement-Supplemental_Materials.pdf]

1  
2  
3  
4  
5  
6  
7  
8  
9  
10  
11  
12  
13  
14  
15  
16  
17  
18  
19  
20  
21  
22  
23  
24  
25  
26  
27  
28  
29  
30  
31  
32  
33

## Supplementary Materials for

Paternally inherited cis-regulatory structural variants contribute to autism

William M Brandler, Danny Antaki, Madhusudan Gujral, Morgan L Kleiber, Joe Whitney, Michelle S Maile, Oanh Hong, Timothy R Chapman, Shirley Tan, Prateek Tandon, Timothy Pang, Shih C Tang, Keith K Vaux, Yan Yang, Eoghan Harrington, Sissel Juul, Daniel J Turner, Bhooma Thiruvahindrapuram, Gaganjot Kaur, Stephen F Kingsmore, Joseph G Gleeson, Denis Bisson, Boyko Kakaradov, Amalio Telenti, J Craig Venter, Roser Corominas, Claudio Toma, Bru Cormand, Isabel Rueda, Silvina Guijarro, Karen S Messer, Caroline M Nievergelt, Maria J Arranz, Eric Courchesne, Karen Pierce, Alysson R Muotri, Lilia M Iakoucheva, Amaia Hervas, Stephen W Scherer, Christina Corsello & Jonathan Sebat  
correspondence to: jsebat@ucsd.edu

**This PDF file includes:**

Materials and Methods  
Figs. S1 to S12  
Captions for Tables S1 to S11

**Other Supplementary Materials for this manuscript includes the following:**

Tables S1 to S11

## 34 **Materials and Methods**

### 35 **Study design**

36 A key challenge in the analysis of large biological datasets is to account for the full array  
37 of hypotheses that are tested during the process of data collection, data filtering,  
38 annotation and statistical analysis. Analysis choices that are made throughout the process  
39 are influenced by properties of the data. Thus, correcting for all of the formal statistical  
40 tests that are performed in a study may not fully account for the “garden of forking paths”  
41 that led to the formulation of these hypotheses (31). It is therefore difficult for the reader  
42 to know for certain if the multiple test correction performed accounts for the full  
43 hypothesis space that could potentially be explored.

44 This is particularly problematic when investigating genetic association in non-coding  
45 regions of the genome. The analyst has almost infinite degrees of freedom in terms of the  
46 selection of functional annotations and gene-sets that could potentially be tested for  
47 association. The solution to this challenge, as proposed by Gelman and Loken (31) is to  
48 pair an initial experiment with a “pre-registered” replication, in which the hypotheses and  
49 all details of analysis are specified in advance. Our study has followed this design, and it  
50 is structured in three stages:

- 51 1. Target functional elements were selected from a larger set of annotations based  
52 on evidence of SV intolerance from this study and from a SV call set from the  
53 1000 genomes project.
- 54 2. Target categories were tested for association in a primary sample of 829 ASD  
55 families. One category of non-coding annotation was significant after correction for

56 multiple testing. This association and all details of the analysis were then posted as a  
57 manuscript to the preprint server bioRxiv (<https://www.biorxiv.org/>).

58 3. The primary hypothesis was subsequently replicated in an independent sample of  
59 1,771 families

60 Stage 1 of this study provides an effective means for reducing the number of tests to a  
61 limited set of functional annotations in which SVs are under strong natural selection. The  
62 prepublication manuscript posted in stage 2 provides a transparent way to state our  
63 primary hypothesis and describe all analysis methods prior to obtaining the replication  
64 dataset. The addition of stage 3, prompted by peer review of the primary study, allows for  
65 confirmation of the primary scientific claim.

## 66 **Recruitment**

67 Our discovery sample consisted of ASD families derived from two cohorts, which will be  
68 referred to as ‘REACH’ or ‘SSC1’ in the following sections.

69 REACH cohort individuals were referred from clinical departments at Rady Children’s  
70 Hospital, including the Autism Discovery Institute, Psychiatry, Neurology, Speech and  
71 Occupational Therapy and the Developmental Evaluation Clinic (DEC) as part of the  
72 Relating genes to Adolescent and Child Health (REACH) study. Further referrals came  
73 directly through the REACH project website (<http://reachproject.ucsd.edu/>). In total 612  
74 individuals from 161 families came from the REACH project. The Autism Center of  
75 Excellence at the University of California San Diego contributed 11 trios. A further 452  
76 samples from 139 families were recruited at Hospital Universitari Mútua de Terrassa in  
77 Barcelona. The REACH families combined consisted of 112 controls and 362 affected

78 individuals - 285 with ASD, 43 with pervasive developmental disorder – not otherwise  
79 specified (PDD-NOS), 10 with attention deficit hyperactivity disorder (ADHD), and 24  
80 with speech delay, epilepsy, anxiety, or other related developmental disorders that were  
81 therefore classified as ‘cases’ for bioinformatics analyses.

82 The Simons Simplex Collection Phase 1 (SSC1) Whole Genome Sequencing dataset  
83 (<http://bit.ly/2jc34rU>) consisted of 518 quad families with sibling pairs discordant for an  
84 ASD diagnosis that were selected from the full cohort of 2,644 families after excluding  
85 those where offspring carried any plausible contributory *de novo* or inherited SNVs,  
86 indels, deletion or duplications identified from microarray or exome sequencing data. The  
87 exclusion criteria for exome- or array- ‘positive’ individuals are described below and were  
88 applied to both ASD cases and sibling-controls:

89 1) *De novo* deletions and duplications (189 families): Any confirmed/published *de novo*  
90 copy number variant (CNV) (10), Illumina SNP genotyping data, or exome CNV data  
91 that is: Rare ( $\leq 0.1$  population frequency based on parents and DGV) or genic ( $\geq 1$  exon).

92 2) Inherited CNVs (92 families): Any CNV from Illumina genotyping data, or exome  
93 CNV data that is: rare ( $\leq 0.1$  population frequency based on parents and DGV), or  
94 intersects  $\geq 10$  genes.

95 3) *De novo* LoF (564 families): Any *de novo* loss of function from published sequencing  
96 data that is: rare ( $\leq 0.1$  population frequency based on the exome variant server),  
97 nonsense, canonical splice site, or frameshift (2, 26).

98

99

100 **Whole Genome Sequencing**

101 Our combined dataset consisted of WGS data collected for two cohorts and sequenced at  
102 three sites (**table S1**). All WGS data were generated from whole blood DNA. All  
103 members of individual families were sequenced within the same batch of samples.

104 **REACH cohort**

105 Whole genome sequencing was performed on blood-derived genomic DNA samples of  
106 1,126 individuals from 319 families, including 893 individuals from 260 families.  
107 Sequencing was performed at Human Longevity Inc. (HLI) on an Illumina HiSeq X10  
108 system (150 bp paired ends at mean coverage of 50X) and an additional 204 individuals  
109 from 59 families that were sequenced at the Illumina FastTrack service laboratory on the  
110 Illumina HiSeq 2500 platform as described in our previous publication (9). We  
111 performed initial quality control (QC) steps to ensure relatedness and gender matched the  
112 sample sheets, excluding any mismatches or half-siblings. We also tested for an excess of  
113 Mendelian errors in the children, and an excess of single nucleotide variants called in  
114 either parent ( $>3$  SD from the mean) indicative of low quality DNA. In total 29 samples  
115 were removed, including eight complete families. Therefore, 1,097 individuals from 311  
116 families were taken forward for structural variant calling and analysis.

117 **SSC1 Cohort**

118 Whole genome sequencing of the SSC phase 1 (SSC1) cohort of 540 families was  
119 performed at the New York Genome Center on an Illumina HiSeq X10 (150 bp paired  
120 ends at mean coverage of 40X). Of the 540 SSC families, 518 were complete quad  
121 families. Incomplete families were excluded from the dataset. All 518 met the above QC

122 criteria for inclusion in the study. Mean coverage (39-50X) and insert sizes (348-420) and  
123 were similar at all three sequencing sites (**table S1**).

124 Sequence alignment and variant calls for REACH samples were generated on families  
125 using our WGS analysis pipeline implemented on the Comet compute cluster at the San  
126 Diego Supercomputer Center (SDSC, <https://goo.gl/C4bVoe>). For SSC samples the same  
127 pipeline was adapted for use on Amazon Web Services (AWS). In brief, short reads were  
128 mapped to the hg19 reference genome by BWA-mem version 0.7.12. Subsequent  
129 processing was carried out using SAMtools version 1.2, GATK version 3.3, and Picard  
130 tools version 1.129, which consisted of the following steps: sorting and merging of the  
131 BAM files, indel realignment, removal of duplicate reads, base quality score recalibration  
132 for each individual.

### 133 **Replication Cohorts**

134 Our hypothesis and all analytic details were pre-registered by posting a preprint  
135 describing the results of our primary analysis (16). We then carried out a replication of  
136 our primary scientific claim in an independent sample.

137 The replication WGS dataset consists of data from two cohorts, the Autism Speaks'  
138 MSSNG program (Principal investigator: S.S.) (17), and the SSC phase 2 (SSC2) sample.  
139 The MSSNG sample consisted of 30X WGS of 3,769 individuals using Illumina HiSeq  
140 X10 platform, including 1,395 ASD cases from 1,187 families (998 trios, 157 quads, 28  
141 quintets, 3 sextets, and 1 septet concordant for ASD). A complete breakdown and list of  
142 samples is provided in **table S1**. The SSC2 cohort consisted of 2,336 individuals from  
143 584 quads discordant for ASD, sequenced and processed in the same way as the first

144 phase of SSC quads. In total the replication cohorts consisted of 6,105 individuals from  
145 1,771 families, including 1,979 ASD cases and 584 sibling controls.

146 **SV detection, genotyping and filtering – discovery cohort**

147 We utilized four complementary algorithms to detect SVs: ForestSV, Lumpy, Manta, and  
148 Mobster. ForestSV is designed to detect deletions and duplications based on a  
149 combination of signatures including, coverage, discordant paired ends and other metrics  
150 such as mapping quality (<http://sebatlab.ucsd.edu/software-data>). Lumpy  
151 (<https://github.com/arq5x/lumpy-sv>) and Manta (<https://github.com/Illumina/manta>;  
152 workflow version 0.29.0), the latter being a new addition to the SV analysis pipeline  
153 since our previous publication (9), both utilize a combination of discordant paired ends  
154 and split reads and have greater sensitivity for small (<500 bp) deletions, duplications,  
155 inversions and complex rearrangements. Finally, Mobster  
156 (<http://sourceforge.net/projects/mobster>) uses discordant paired-end and split-read signal  
157 in combination with consensus sequences of known active transposable elements to  
158 identify mobile element insertions (MEIs). A consensus callset was generated by merging  
159 calls from ForestSV, Lumpy, Manta and Mobster. SV calls from multiple methods were  
160 combined, and overlapping variants detected in the same sample were collapsed as  
161 described in our previous structural variant publication (9). The unfiltered consensus  
162 callset consisted of the union of calls from the four methods. As a preliminary filtering  
163 step, SVs were removed from the consensus callset if they overlapped by more than 66%  
164 with centromeres, segmental duplications, regions with low mappability with 100bp  
165 reads, regions subject to somatic V(D)J recombination (parts of antibodies and T-cell  
166 receptor genes). SVs called by Manta or Lumpy were filtered if they had one or both

167 breakpoints overlapping one of these regions. Regions used for filtering can be found in  
168 our previous publication (9).

169 We generated a set of uniformly-called genotypes for the combined set of deletions and  
170 duplications detected by three methods Lumpy, Manta, or ForestSV, using a single  
171 genotyping algorithm *SV<sup>2</sup>* (<https://github.com/dantaki/SV2>). *SV<sup>2</sup>* (11) provides estimates  
172 of genotype likelihoods for deletions and duplications across a broad size range (10bp-  
173 10Mb), and this metric was used as our primary filtering criterion for these. Lumpy and  
174 Manta also provide genotype likelihoods for the subset of calls that were generated by  
175 these methods, which include SVs that are not genotyped by *SV<sup>2</sup>* such as inversions and  
176 non-tandem duplications. These genotype likelihoods were also used as quality metrics  
177 during the filtering of SV callset as described below.

178 *SV<sup>2</sup>* designates SV calls as “PASS” or “FAIL” at two levels of stringency: “standard” and  
179 “de novo”, which are described in detail in our companion paper (11). Standard filters  
180 were used to generate the main SV callset and these genotypes were used for family  
181 based association testing. The more stringent “de novo” filters were used for de novo  
182 mutation calling. In addition, we included in the consensus callset SVs, which passed  
183 genotype likelihood thresholds for Lumpy and Manta. Manta and Lumpy genotype-  
184 likelihood thresholds for SV filtering were determined based on estimates of FDR, which  
185 were performed from Illumina 2.5M SNP array data on a subset of 205 genomes using  
186 the Intensity Rank Sum test implemented using the Structural Variation Toolkit.  
187 Thresholds were selected for SVs across a range of sizes and depending on sequence  
188 context (short tandem repeats, segmental duplications, etc.). FDR estimates for SV calls



189 filtered at standard and de novo stringency and genotype likelihood thresholds for Lumpy  
190 and Manta are provided in **table S3**.

191 Due to the requirements of this study for high genotyping accuracy, we have applied  
192 additional filtering measures that were not used in a previous publication from our group  
193 (9). The FDR of variants intersecting STRs was an order of magnitude higher than SVs  
194 that did not; therefore more stringent genotype likelihood filters were applied to SVs  
195 overlapping STRs (**table S3**). Furthermore because STRs were depleted in probes on the  
196 Illumina 2.5M SNP array, only 7.2% of deletions and 12.9% of duplications overlapping  
197 an STR had one or more probes, compared to 28.5% of deletions and 56.3% of  
198 duplications that do not. FDR estimates for these variants could be less accurate.  
199 Therefore, for all analyses in this study, we have excluded SVs with breakpoints  
200 overlapping STRs. We have also annotated these in the callset VCF (which can be  
201 downloaded from NDAR study #434), and we suggest that these SVs be treated with  
202 caution. Hence, the number of deletions and duplications reported in the SV callset here  
203 is lower than in our previous publication (8, 9).

204 In total we detected 11.87 million alleles from 89,123 distinct loci encompassing 19.4%  
205 of the GRCh37 (hg19) release of the ‘mappable’ reference human genome  
206 (0.497/2.57Gb, excluding SVs larger than 1Mb, which are likely to be pathogenic and  
207 would contribute disproportionately to this estimate, **table S2**). 12.5% (320Mb) of the  
208 reference genome was deleted and 7.3% (186Mb) duplicated in our cohort of 829  
209 families.

210

211

212 **SV detection, genotyping and filtering – replication cohort**

213 **MSSNG**

214 Data processing was performed by Scherer laboratory, and functional annotation of SV  
215 calls was performed using an annotation file that we provided. Briefly, for 2,945  
216 individuals alignment was performed using BWA version 0.7.10. SV calling was  
217 performed on a per family basis using Manta and Lumpy, with genotyping using SV<sup>2</sup>  
218 following the pre-registered protocol (described above). For a subset of individuals (n =  
219 824) sequence alignment was performed with the ISAAC aligner and SV calling was  
220 performed by Manta on a per individual basis, but with genotyping of each SV call on a  
221 per family basis using SV<sup>2</sup>.

222 **SSC2**

223 The SSC phase 2 (SSC2) data was processed on the Amazon Web Services cloud in a  
224 manner identical to that for SSC1. SV genotypes from the replication dataset were  
225 intersected with our original SV callset based on the confidence intervals for SV  
226 breakpoints given by Manta / Lumpy. We then identified SVs that had an allele  
227 frequency <0.0003 (the allele frequency for private variants in our original study).

228 **De novo calling and phasing**

229 *De novo* SVs were called if they occurred in a child and were genotyped reference in both  
230 parents and the parent allele frequency for the variant was less than 1%. We also applied  
231 more stringent SV<sup>2</sup> genotype likelihood filters for *de novo* SVs and TDT analyses, which  
232 are detailed in **table S3**. The average rate of Mendelian errors for deletions and  
233 duplications in the callset as a whole was 0.99% (95% CI: 0.03) and 4.66% (95% CI:

234 0.15) respectively (**fig. S4**). *De novo* genotype likelihood filters applied to variants with  
235 parent allele frequencies <1% reduced the rate to 0.21% (95% CI: 0.1) for deletions and  
236 0.5% (95% CI: 0.2) for duplications.

### 237 **SV validation**

238 We validated large putative *de novo* deletions and duplications using an in silico SNP-  
239 based approach that utilizes read depth from the VCF files from GATK Haplotype Caller.  
240 For each SNP we normalized allelic read depth relative to the genome average for  
241 reference / alternate alleles, and calculated a z-score for each SNP. We also calculated the  
242 B allele frequency (BAF) by taking the average of the allele (reference or alternate) with  
243 the fewest number of supporting reads across the locus. Since deletions are hemizygous,  
244 the expected BAF is 0. For duplications we calculated the BAF only for heterozygote  
245 SNPs, which have an expected BAF of 0.33 for autosomal variants. If the child showed  
246 an average elevated or depleted SNP read depth more than one standard deviation from  
247 both parents, and a BAF consistent with the SV type, and/or the variant could be phased,  
248 then the SV was designated as valid. Furthermore this SNP data was used to determine  
249 the parent of origin, by performing a paired t-test on phased SNP allelic depth within the  
250 locus. We plotted the validation results for each member of the trio using the R package  
251 CNVplot, which was developed in house (<https://github.com/dantaki/CNVplot>). This  
252 approach is orthogonal to the SV calling steps above, which do not phase variants,  
253 calculate their BAF, or estimate coverage using SNP data.

254 Small deletions, duplications, inversions, complex SVs, and MEIs were validated using  
255 PCR. Both *de novo* inversion calls were validated. We attempted PCR validation on 13  
256 *de novo Alu* elements, all of which validated as *de novo*. *Alu* insertions have poly-A tails;

257 we therefore used a lower extension temperature (65°C), because A/T rich sequences  
258 have a low melting temperature. We also used longer extension times (90 seconds) to an  
259 otherwise standard PCR protocol.

#### 260 **Validation and FDR estimation by Nanopore sequencing**

261 We validated deletions and duplications predicted in Illumina short read paired-end  
262 genomes in three unrelated individuals with Oxford Nanopore (ONP) long read  
263 sequencing. ONP reads were aligned to the human hg19 reference with bwa-mem  
264 (version 0.7.10-r789) and ngmlr (<https://github.com/philres/ngmlr>, version 0.2.3) with the  
265 “-x ont2d” and “-x ont” options. The average coverage was 7.4X and average read length  
266 was 2,574bp for bwa-mem alignments and 7.3X and 2,525bp for ngmlr alignments. We  
267 restricted validation to variants with less than 50% overlap to elements in our genome  
268 mask. Additionally, we ensured that the median base-pair depth of coverage was greater  
269 than 0X in 1000bp regions flanking the breakpoints, totaling 3,252 deletion and 62  
270 duplication candidates for validation. We then searched for supporting reads in bwa-mem  
271 and ngmlr alignments, defined as supplementary alignments or CIGAR string deletions  
272 and insertions with breakpoints that overlap at least 50% reciprocally to the SV in  
273 question. Short-read SV predictions were considered validated if at least 1 supporting  
274 read was detected in either bwa-mem or ngmlr alignments. We then calculated the false  
275 discovery rate (FDR) specifying false positives as SVs without supporting reads while  
276 binning on allele frequency and SV length. The overall FDR was 10.4% for deletions and  
277 30.6% for duplications; for private variants of SV length 100bp-1000bp the FDR was 0%  
278 for deletions.

279

280 **Oxford Nanopore Targeted Validation of *LEOI***

281 Recurrent deletions of the *LEOI* locus were validated and fine mapped by single  
282 molecule sequencing. Deletion and reference haplotype sequences were amplified by  
283 long range PCR (LongAmp® Taq 2X Master Mix, New England BioLabs, M0287L) in  
284 carriers of *LEOI* deletions from three families (14-59, F0182, and F0208). Target  
285 sequences were amplified from each sample using one set of primers that span the  
286 deletion breakpoint and another set that specifically amplifies the reference (non-  
287 deletion) haplotype, and PCR amplicons were gel purified. Samples were barcoded using  
288 Oxford Nanopore Technologies' (ONT) Native Barcoding Kit 1D (EXP-NBD103) and  
289 sequencing adapters were added using Ligation Sequencing Kit 1D (SQK-LSK108).  
290 Libraries were sequenced for 48 hours on ONT's MinION Mk1B, using the SpotON  
291 Flow Cell Mk I (R9.4, FLO-SPOTR9) and MinKNOW software (v.1.3.30). In total  
292 approximately 2.3 Gb of fasta data was generated.

293 Quality and length filters were applied to the unaligned reads. Reads with a mean quality  
294 score of 8.5 or less or which differed from the expected amplicon length by 2kb or more  
295 were removed. Reads were aligned to the human genome (hg19) using BWA-mem  
296 (v.0.7.15-r1140) with the '-x ont2d -M' flags and filtered to keep only those that  
297 overlapped 95% of the target region. Consensus sequences were generated from the  
298 alignment of multiple reads using Mummer (<http://mummer.sourceforge.net/>), and  
299 deletion breakpoints were identified by aligning the consensus sequence to the reference  
300 genome using BLAT. The consensus fasta sequences can be downloaded from NDAR.

301

302

303 **Evaluation of SV calling across data from multiple sequencing centers**

304 The average SV numbers for each class of SV were similar between cohorts sequenced at  
305 different sequencing centers (**table S1**). Modest differences in SV calling were observed  
306 between sequencing centers. We compared SV calls for one individual (REACH000236)  
307 who was sequenced twice, on the Illumina HiSeq 2500 with 100bp reads (at 43X  
308 coverage) and on the Illumina HiSeq X with 150bp reads (also at 43X coverage). Since  
309 the coverage is the same between the two samples but the read length is 50% longer on  
310 the HiSeq X, this sample has only 2/3 as many reads when sequenced on the HiSeq X.  
311 This affects SV calling for two reasons, there will be on average more split reads  
312 supporting each call on the HiSeq X, but fewer discordant paired-end reads. The overlap  
313 between the SVs called on each platform in this sample ranged from 66-96% for each SV  
314 type (**fig. S12**).

315 **Selection of target functional elements based on SV intolerance**

316 We investigated the enrichment/depletion of private deletions, duplications, and mobile  
317 element insertions within specific genomic features compared to a random distribution of  
318 SVs. Random distributions of SVs were simulated using two different models of random  
319 mutation: (1) a uniform random model (UM) in which we shuffled the position of sites  
320 that were private to families (i.e. observed in only one parent) across the genome using  
321 BedTools and (2) a non-uniform random model (NUM) based on a concept used  
322 previously (15), in which the correlation of SVs to genome features was modeled by  
323 fitting a linear regression to the observed rate of SV breakpoints to GC content, coverage,  
324 low-complexity repetitive elements, and segmental duplications. A probability density  
325 function derived from the linear model was then used to simulate random SVs. In both

326 cases we excluded regions of the genome that cannot be sequenced with short reads. We  
327 counted the number of times a shuffled SV overlapped (at least 1bp) the following  
328 genomic features: protein coding exons, transcription start sites (TSS), 5'UTRs, 3'UTRs,  
329 promoters, noncoding RNAs, enhancers, conserved noncoding regions, human  
330 accelerated regions, CTCF binding sites, exon flanking (one breakpoint within 100bp of  
331 an exon), 1kb upstream, 1kb downstream, and introns. Events that overlapped multiple  
332 features were prioritized in the order above, so for example if a variant overlapped a  
333 protein coding exon, a 3'UTR and an intron, it is counted as protein coding but not  
334 3'UTR or intronic. Each feature is explained in detail below and we've summarized each  
335 in a table included as part of **table S5**. We performed 10,000 permutations and compared  
336 the observed overlap to the expected overlap. P values were corrected using a Benjamini–  
337 Hochberg false-discovery rate adjustment, and Q values are reported in **table S5**.  
338 Categories that were depleted among variant-intolerant genes (ExAC pLI>90<sup>th</sup> percentile)  
339 were selected as targets in our primary analysis. Significant depletion was defined as  
340  $OR < 1$  and FDR adjusted  $Q < 0.01$ .

#### 341 **Generating a random distribution of SVs using a linear regression model**

342 Structural mutation rates vary across the genome, and regional differences in the rate of  
343 SVs introduce biases in the distribution of SVs that could confound our estimates of SV  
344 intolerance. To address this concern, we adapted a model from Ruderfer et al. (15) to  
345 estimate SV mutation rate and to simulate variants according to a non-uniform,  
346 empirically-derived random distribution that is more reflective of true genomic  
347 background than assuming uniform random mutation. Our NUM model fits a linear  
348 regression for the observed rate of SV breakpoints (in 1000 bp windows) in relation to

349 GC content, coverage, overlap with low complexity repetitive elements, and intersection  
350 with segmental duplication regions.

351 Coverage tracks were generated from SSC, 1000 genomes, and REACH samples. At least  
352 30 samples were used to generate each track. Fine-grain GC content, repetitive element,  
353 and segmental duplication overlap tracks were generated from raw data available on  
354 UCSC genome browser. These tracks were then used to fit three linear regression models  
355 to predict the empirical density of SV breakpoints in each data set for benign variants.  
356 These linear regression models were then converted into probability density functions  
357 (pdfs) that could be used to simulate new background variants.

358 10,000 simulations were performed to shuffle the variants in each data set. Our empirical  
359 pathogenic predictions were compared against the generated null distributions. The  
360 results did not differ significantly after correcting for SV background mutation rates  
361 according to the Ruderfer model.

### 362 **Definitions of gene disrupting SVs versus noncoding**

363 Gene disrupting deletions were defined as those that directly disrupted at least one  
364 protein coding exon from one transcript of a gene (transcripts were extracted from hg19  
365 RefSeq). Noncoding deletions could delete UTRs, introns, enhancers, or promoters of  
366 genes, but not protein coding exonic sequence or the start position of the first exon of a  
367 transcript. Protein coding duplications were divided into four categories. Whole gene  
368 duplications encompassed at least one full-length transcript of a gene. Internal exon  
369 duplications intersected at least one protein coding exon internal to a transcript, but not  
370 the UTRs. Duplications that intersected at least one exon and with one breakpoint outside  
371 of the gene and the other internal to the gene were divided into two categories, those that



372 encompassed the 5'UTR (and promoter), and those that encompassed the 3'UTR. Gene  
373 disrupting inversions were classified as variants that either had one or both breakpoints  
374 inside a protein coding exon of a gene, or that had one breakpoint in an intron of a gene  
375 and the other breakpoint either outside of that gene or in another intron. Inversions that  
376 inverted an entire gene or genes but had intergenic breakpoints were considered  
377 noncoding.

### 378 **Definition and selection of noncoding elements**

379 Transcription start sites, 3'UTRs, and 5'UTRs were defined using full-length protein-  
380 coding transcripts from RefSeq. Two types of noncoding RNAs, micro-RNAs and natural  
381 antisense transcripts were defined. Human micro-RNAs were downloaded from miRBase  
382 (mirbase.org, v21), lifted over to hg19 annotated to genes if they were intronic in a sense  
383 orientation and therefore transcribed with the gene itself. Exons of natural antisense  
384 transcripts (NATs) were assigned to genes if they were transcribed in an antisense  
385 direction and overlapped with a gene. NAT data was downloaded from GENCODE v25  
386 (only including transcripts with support level of 1, 2 or 3).

387 Conserved noncoding regions were defined from two studies; one that defined  
388 ultraconserved elements > 100bp conserved in human, mouse and rat genomes (32), and  
389 the other that defined ultrasensitive noncoding regions with almost as much selective  
390 constraint as coding genes (33).

391 Promoters and enhancers were defined using fetal brain data Epigenomics Roadmap  
392 Project and data from ENCODE. The Epigenomics Roadmap Project integrated  
393 combinatorial interactions between five different chromatin marks to define 15 chromatin

394 states using a Hidden Markov Model  
395 ([http://egg2.wustl.edu/roadmap/web\\_portal/chr\\_state\\_learning.html](http://egg2.wustl.edu/roadmap/web_portal/chr_state_learning.html)).

396 Four states were used to define promoters, active transcription start site (1\_TssA), TSS  
397 flank (2\_TssAFlnk), bivalent TSS (10\_TssBiv), and bivalent TSS flank (11\_BivFlnk).  
398 Three states were used to define fetal brain enhancers, genic enhancer (6\_EnhG),  
399 enhancer (7\_Enh), and bivalent enhancer (12\_EnhBiv).

400 For the Epigenomics Roadmap Project data, fetal brain promoters/enhancers were  
401 defined using the intersection of male and female fetal brain tissue (epigenomes: E081 &  
402 E082). Adult brain promoters/enhancers were defined using the intersection of  
403 epigenomes from eight brain regions (E067 (Angular gyrus), E068 (Anterior Caudate),  
404 E069 (Cingulate Gyrus), E070 (Germinal Matrix), E071 (Hippocampus), E071 (Inferior  
405 Temporal Lobe), E073 (Dorsolateral Prefrontal Cortex), & E074 (Substantia Nigra)),  
406 excluding any elements that intersected with those in fetal brain.

407 ENCODE enhancers and promoters were defined based on chromatin state segmentations  
408 from six human cell lines (GM12878, K562, H1-hESC, HeLa-S3, HepG2, and HUVEC),  
409 which integrated ENCODE ChIP-seq, DNase-seq, and FAIRE-seq data from two  
410 algorithms (chromHMM and Segway) to segment the genome into seven states. Data for  
411 all six cell types was downloaded from UCSC genome browser, two states were used to  
412 defined ENCODE promoters, predicted promoter or transcription start site (state: TSS),  
413 predicted promoter flanking region (state: PF). One state was used to define ENCODE  
414 enhancers, predicted strong enhancer (State: E). ENCODE CTCF enriched elements were  
415 used to define CTCF binding sites (State: CTCF). Promoters and Enhancers were

416 assigned to genes based on proximity, if they intersected or were within 10kb of the  
417 transcription start site of an isoform of the gene.

418 Assigning enhancers to genes based purely on proximity is not the most effective  
419 approach, as the majority of annotated enhancers do not interact with the nearest gene.  
420 We therefore implemented TargetFinder (<https://github.com/shwhalen/targetfinder>), a  
421 machine-learning algorithm that annotates to genes with an FDR <15% by integrating  
422 features such as DNA methylation, histone marks, and cap analysis of gene expression  
423 (CAGE) data to predict distal enhancers (distance 10kb-2Mb) that interact with  
424 promoters. We extracted all enhancers predicted to directly activate genes in six cell  
425 types from ENCODE (GM12878, HeLa-S3, HUVEC, IMR90, K562, & NHEK). We also  
426 attempted to assign enhancers to genes using the correlation of expression between  
427 enhancers and promoters within 500kb of each other using data from FANTOM5  
428 (<http://fantom.gsc.riken.jp/data/>).

429 We downloaded chromatin interaction analysis by paired-end tag (ChIA-PET) data  
430 detailing the interactome map between noncoding elements and transcription start sites  
431 through CTCF or RNA polymerase II interactions (21, 22). For each interacting pair of  
432 elements if one member of the pair overlapped a promoter of a gene (within 10kb) we  
433 assigned its pair to the target gene as a putative noncoding interacting element.

434 Finally fetal central nervous system DNase hypersensitivity data (6) and ‘human  
435 accelerated regions’ that have undergone rapid evolution since the split from  
436 chimpanzees (5) were also tested. Both these features were assigned to genes based on  
437 proximity as for enhancers and promoters.

438

439 **Defining variant-intolerant genes and annotating known ASD genes**

440 Genes were categorized based on their probability of being loss-of-function (LoF)  
441 intolerant (pLI) as assessed by large-scale exome sequencing of populations by the  
442 Exome Aggregation consortium (ExAC) (12). The EXAC release 0.3.1 dataset (January  
443 2016) was downloaded, and we used the published pLI scores that were calculated on the  
444 subset of the cohort after excluding individuals with schizophrenia. The pLI score ranges  
445 from 0-1 for 18,421 genes, with higher scores indicating that a gene is more intolerant to  
446 inactivating mutations.

447 Our set of known autism genes were taken from the integration of ASD array data and  
448 exome sequencing of the SSC cohort (10), and genes with an FDR < 0.1 from another  
449 large scale whole exome sequencing study (18). In total there are 71 ASD associated  
450 genes.

451 **Transmission Disequilibrium Test**

452 Family-based association tests were performed using  $SV^2$  genotype calls for SVs filtered  
453 at standard stringency. We tested whether variants private to families in our callset were  
454 transmitted to affected children or controls more or less than expected by chance, using a  
455 two-tailed haplotype-based group-wise transmission disequilibrium test (gTDT) (34),  
456 assuming a dominant model. Variants smaller than 100bp or overlapping STRs (>50%)  
457 were excluded as it is challenging to validate them or estimate their FDR. We further  
458 excluded two families from this analysis, one family where the parents DNA was cell line  
459 derived (MT\_121), and one family where the mother and child had an excess of coverage  
460 based calls from ForestSV (F0226).

461 Our analysis focused on genes with pLI scores  $\geq$  90<sup>th</sup> percentile, which we determined  
462 are enriched for genes associated with autism from published exome studies. We also  
463 only tested features that were SV intolerant from the callset permutation analyses above  
464 as we hypothesize that these features will be enriched for variants associated with autism.  
465 P values were corrected for multiple testing using a Benjamini–Hochberg false-discovery  
466 rate adjustment.

467 To compare paternal and maternal transmission rates to cases we performed a binomial  
468 test under the assumption that 50% of transmitted variants should derive from each  
469 parent.

#### 470 **Considering potential biases or technical artifacts in the TDT**

471 The transmission disequilibrium test requires accurate genotyping of variants.  
472 Genotyping error can result in the apparent biased transmission of parental variants to  
473 offspring. For example false-positive SV calls in parents or false negative genotype calls  
474 in children can lead to an apparent under-transmission bias. For instance, given an FDR  
475 of 2% for SV calls in parents, and no transmission of the false calls, a rate of 48%  
476 transmission would be consistent with random segregation. This modest under-  
477 transmission bias, is not specific to SVs, and is also apparent for single nucleotide  
478 variants genotyped using GATK (34).

479 We have therefore evaluated the potential for genotyping error to lead to spurious results  
480 in the TDT as part of a companion study (11) and in this study, we further examined the  
481 rates of Mendelian error and transmission to offspring for private SVs across a broad size  
482 range (**fig. S4**). Our results suggest that private >100 bp deletions and duplications  
483 respectively have low FDR (2.3% and 1.7%) and Mendelian error rates (2.0% and 0.6%).

484 Since only a small fraction (2.7%) of SVs <100bp in length overlapped with probes on  
485 the Illumina 2.5M SNP microarray we could not accurately estimate the FDR for these;  
486 therefore SVs <100bp in size were not included in our analysis.

487 As an additional control in the TDT we also demonstrate that there is no transmission  
488 bias for SVs in a non-depleted control category (intronic), which has a similar length  
489 distribution (mean = 1,988 bp) to the cis-regulatory category (mean = 2,920 bp). We also  
490 observe 50% transmission in tolerant genes for all functional categories of private SVs  
491 that were tested (**table S6**). We are therefore able to rule out a systematic transmission  
492 bias as an explanation for our results. Lastly, over-transmission of private coding and  
493 noncoding SVs was specific to cases, not observed in controls, and the association was  
494 replicated in an independent cohort.

#### 495 **Test for enrichment of recurrent SVs in cases**

496 To permute the relative enrichment / depletion of SVs overlapping the same functional  
497 elements (e.g. exons) in different families, we permuted these variants across the genome  
498 ensuring that permuted variants intersected at least one functional element of a gene with  
499 a pLI score  $\geq 90^{\text{th}}$  percentile using bedtools shuffle (by implementing the `-incl`  
500 command). Variants could overlap because of an elevated mutation rate We excluded  
501 variants that overlapped a functional element that was also overlapped by a variant from  
502 the 1000 Genomes phase 3 SV callset, or that overlapped  $\geq 50\%$  with a 1000 Genomes  
503 variant, to exclude variants that may reside in hotspots for structural mutation. We  
504 repeated the analysis for controls and for genes with pLI scores  $< 90^{\text{th}}$  percentile. For  
505 analysis of coding variants we required that observed / permuted variants impacted any  
506 exon of the same gene to be considered recurrent. For noncoding analysis we required

507 that variants impacted the same element (e.g. a 5'UTR from the same transcript) to be  
508 considered recurrent. We counted the number of times we observed a gene or functional  
509 element was intersected by more than one distinct SV and compared this to 10,000  
510 permutations.

### 511 **Testing the association of *LEO1* *de novo* mutations with ASD and DD**

512 A series of 20 different studies have been published that reported all *de novo* mutations  
513 detected across the exome in cases. For a specific candidate locus in this study we have  
514 investigated the potential association with developmental disorders base on tests of *de*  
515 *novo* mutation burden in a large combined sample of 13,391 subjects.

### 516 **SV Burden**

517 The burden of *de novo* structural variants between individuals with ASD in this study and  
518 the controls from this study was assessed using a case-control permutation test  
519 implemented in PLINK.

### 520 **Mutational Clustering**

521 To assess whether *de novo* SVs cluster with *de novo* nucleotide substitutions or indels,  
522 we used a window based permutation approach. We took windows of 100bp, 1kb, 10kb,  
523 100kb, 1Mb, and 10Mb around the breakpoints of *de novo* SVs and intersected the  
524 windows with *de novo* SNVs and indels in the same individuals (*de novo* detection of  
525 SNVs and indels was performed as described in our previous publication (9). We then  
526 shuffled the position of these windows in the genome either randomly (excluding regions  
527 that were filtered during SV calling) or across detected inherited SV breakpoints using

528 BedTools and calculated the expected number of window overlapping DNMs using  
529 100,000 permutations.

### 530 **Fibroblast cell culture and quantitative RT-PCR**

531 Dermal fibroblasts were obtained from two carriers of LEO1 deletions (a father and son)  
532 identified in our study and additional unrelated control subjects by punch biopsy.  
533 Fibroblast cell lines were then derived by Cellular Dynamics international  
534 (<https://cellulardynamics.com/>) as part of the California Institute for Regenerative  
535 Medicine Tissue Collection for Neurodevelopmental Disabilities (<http://bit.ly/2mKUHB2>)  
536 and then provided to our lab for further study. Samples used for analysis included  
537 fibroblasts from F0182|REACH000322 (ASD proband and deletion heterozygote),  
538 F0182|REACH000321 (father, deletion heterozygote), and three unrelated control  
539 samples: CW60038, CW60044, and JS034. Cells were recovered from cryogenic storage  
540 as per CIRM's protocol and cultured in Dulbecco's modified eagle medium (DMEM)  
541 supplemented with 10% fetal bovine serum, 2 mM L-glutamine, 100µg/ml penicillin and  
542 100µg/ml streptomycin (Thermo Fisher Scientific, Waltham, MA, USA). Cells were  
543 maintained in an incubator at 37°C at 5% CO<sub>2</sub> and harvested for RNA isolation at  
544 passage three.

545 Total RNA was isolated using the Quick-RNA Microprep kit (Zymo Research, Irvine,  
546 CA, USA) protocol for adherent cells with in-column DNase treatment. cDNA was  
547 synthesized from 100 ng of RNA using random oligo primers as part of the High  
548 Capacity cDNA Reverse Transcription kit (Applied Biosystems, Foster City, CA, USA)  
549 according to the manufacturer's protocol. Multiplexed qPCR reactions were conducted in  
550 triplicate for each sample using gene-specific predesigned PrimeTime<sup>®</sup> qPCR assays for



551 *LEO1* (Hs.PT.58.448164, FAM-labeled) and the housekeeping gene *HPRT1*  
552 (Hs.PT.58v.45621572, HEX-labeled) (Integrated DNA Technologies, Coralville, IA,  
553 USA) on a CFX Connect Real-Time PCR System (Bio-Rad, Hercules, CA, USA) along  
554 with no-template and no-reverse-transcription controls. Changes in gene expression were  
555 calculated using the comparative  $C_T$  method and the null hypothesis was assessed using  
556 a Student's two-tailed unpaired T-test.

557

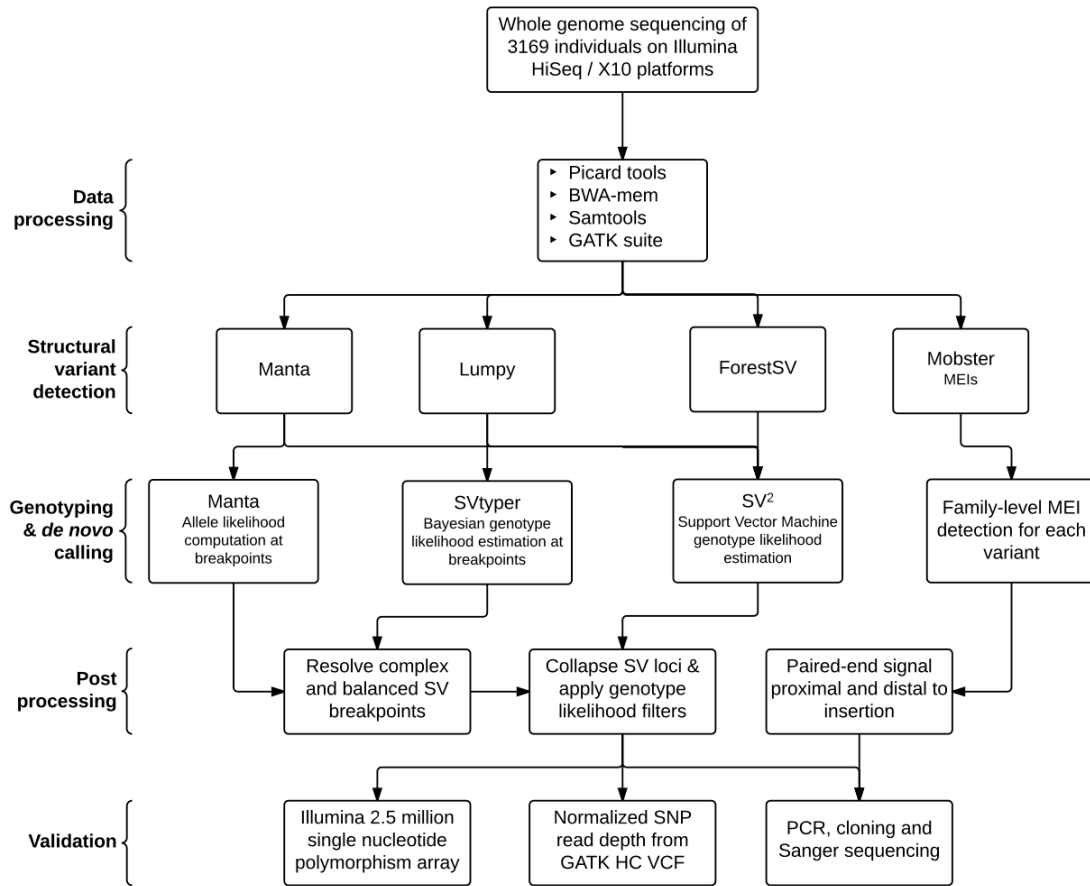

558

559 **Fig. S1.**

560 Flowchart detailing our custom pipeline for the discovery, genotyping, and validation of  
 561 structural variants and *de novo* mutations. SV = Structural Variant; MEI = Mobile  
 562 Element Insertion; PCR = Polymerase Chain Reaction.

563

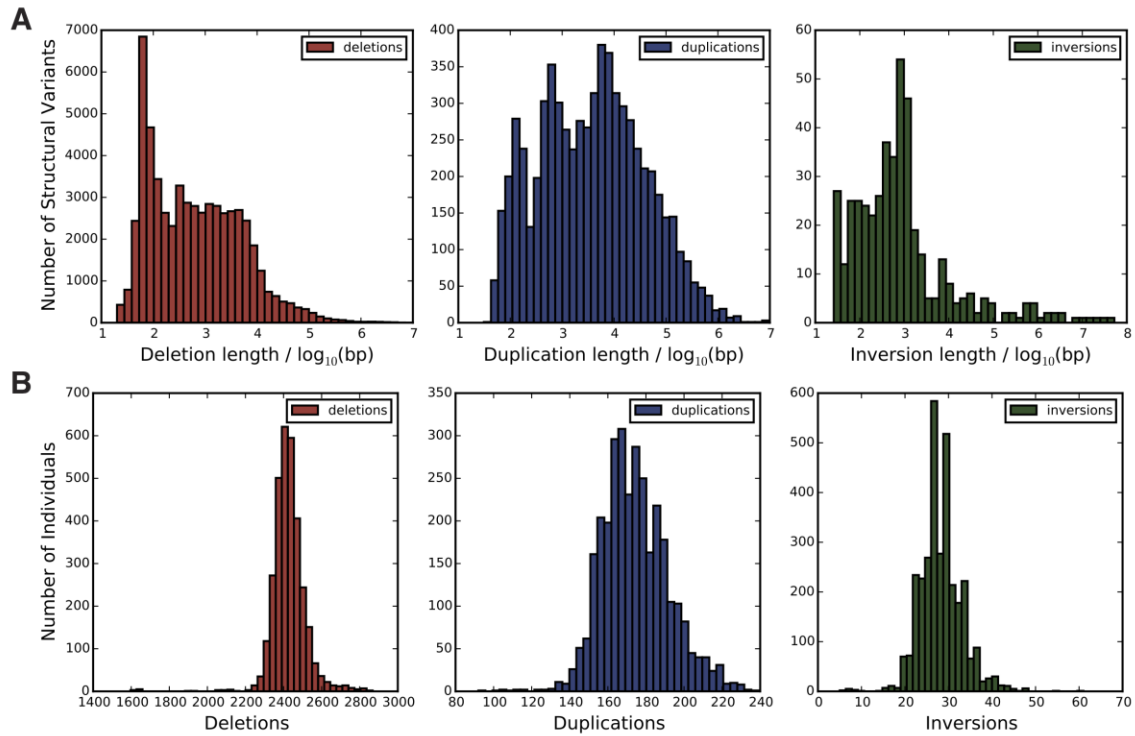

564

565 **Fig. S2**

566 A) Histogram of the size distribution of deletions, duplications, and inversions per  
 567 individual (log10 scale). B) Histogram of the number of deletions, duplications, and  
 568 inversions per individual.

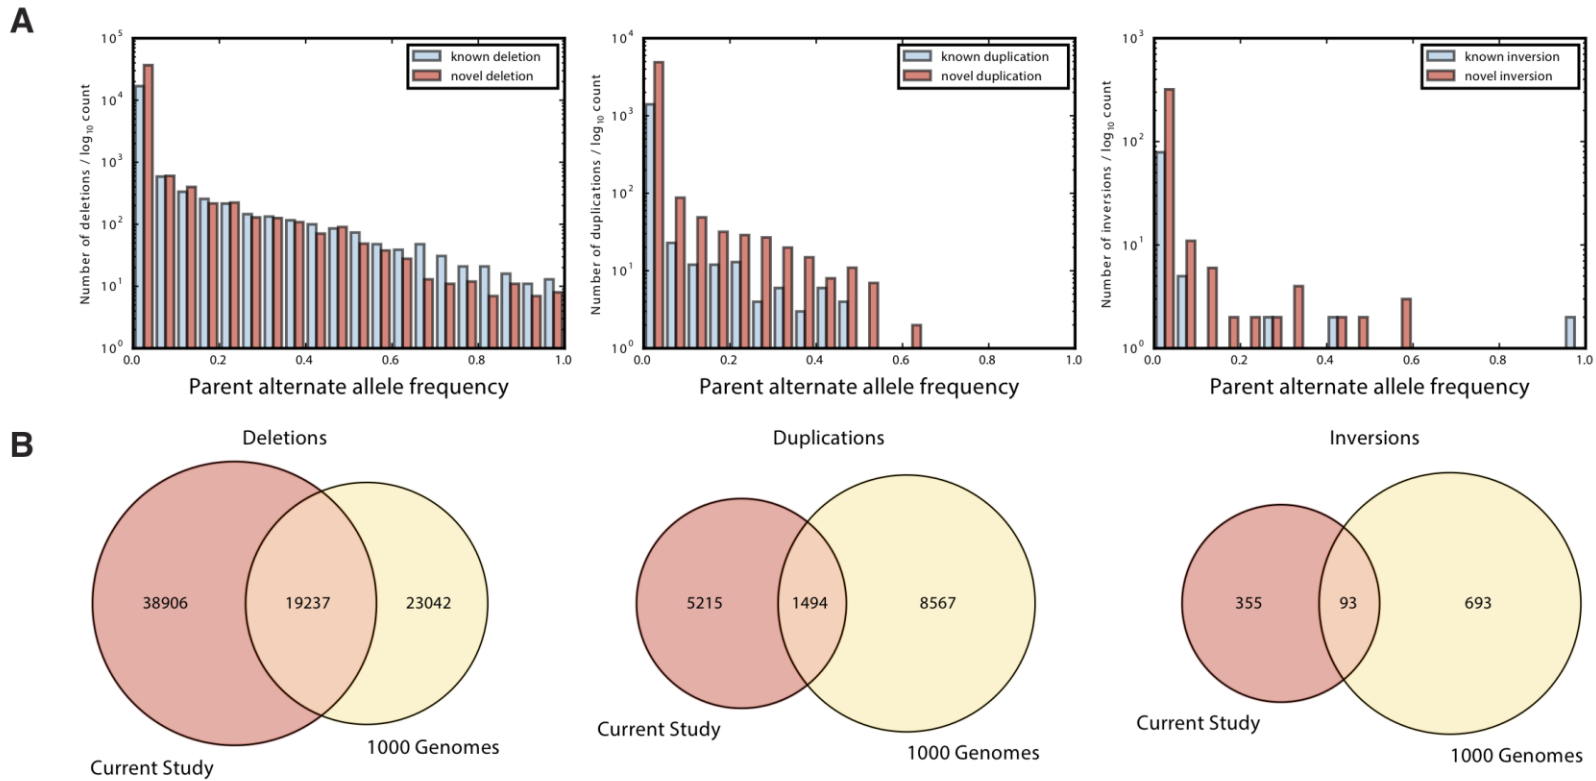

569

570 **Fig. S3**

571 Comparison of the SV call set from the discovery sample with the 1000 Genomes Phase 3 SV call set. A) Frequency of deletions,  
 572 duplications, and inversions across parent allele frequency bins, stratified on known variants (from 1000 Genomes), and novel variants  
 573 (detected only in this study). B) Venn diagrams of overlap of deletions, duplications, and inversions from our cohort with the 1000  
 574 Genomes.

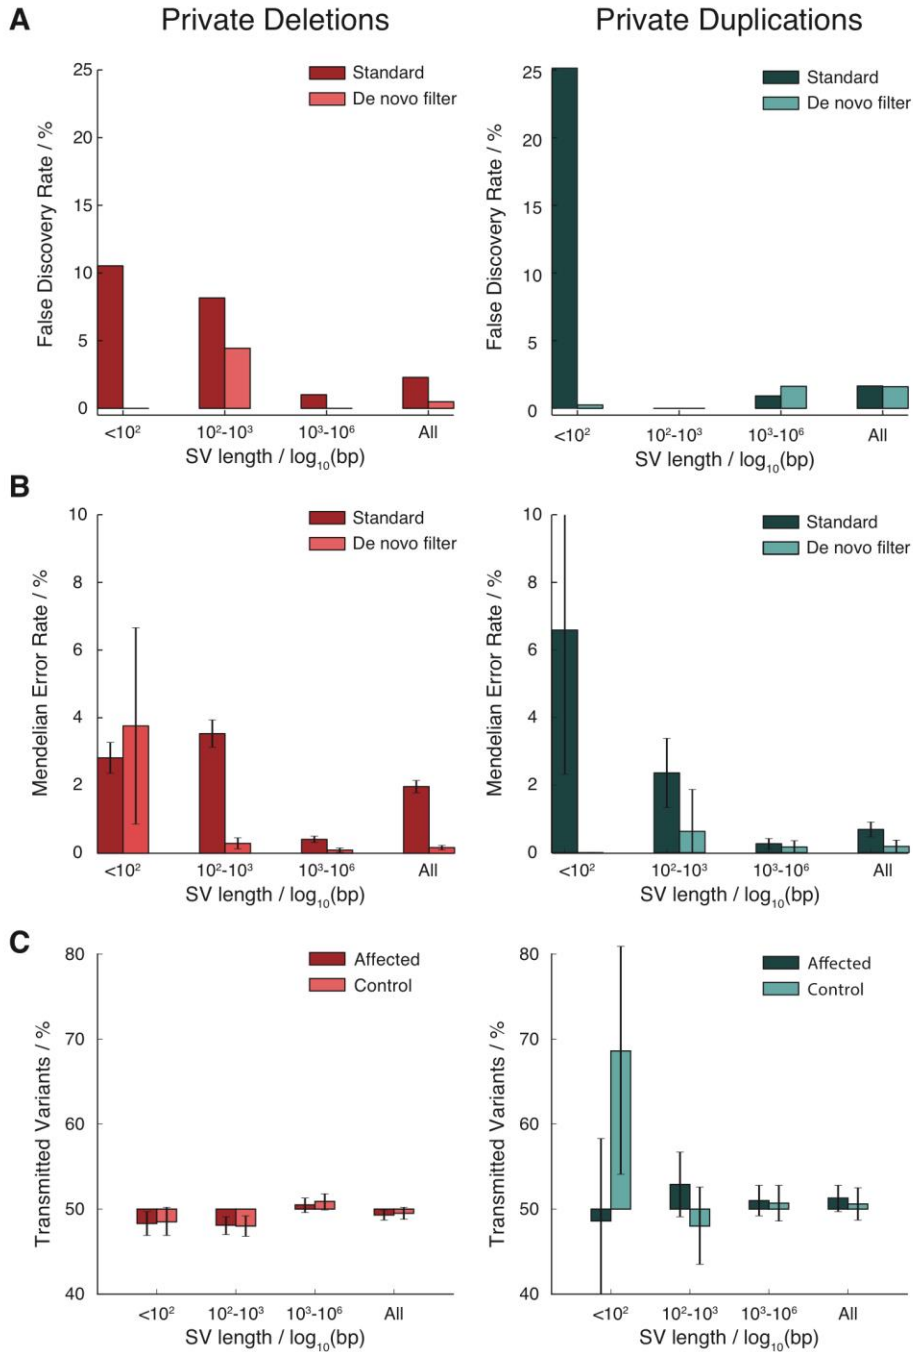

575  
576

**Fig. S4**

577 Metrics of genotyping accuracy for deletions and duplications by size. Bar charts  
578 illustrating A) FDR based on intensity rank sum test from microarray, B) Mendelian  
579 error rates, and C) variant transmission rates stratified on SV type (deletion and duplication)  
580 and SV length bins for private variants. Quality metrics are reported for all private SVs in  
581 the callset filtered based on  $SV^2$  genotype likelihood at two levels of stringency  
582 (“standard” and “*de novo*”). Whiskers represent 95% confidence intervals.

583

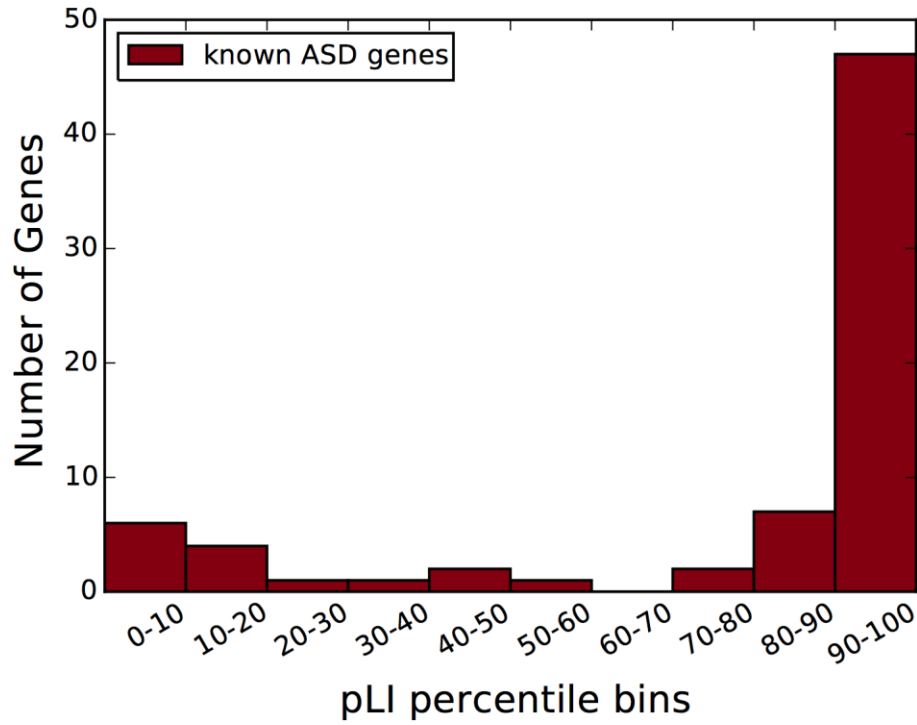

584

585 **Fig. S5**

586 Known autism genes are concentrated among genes that are most intolerant to loss-of-  
587 function variants (pLI > 90<sup>th</sup> percentile).

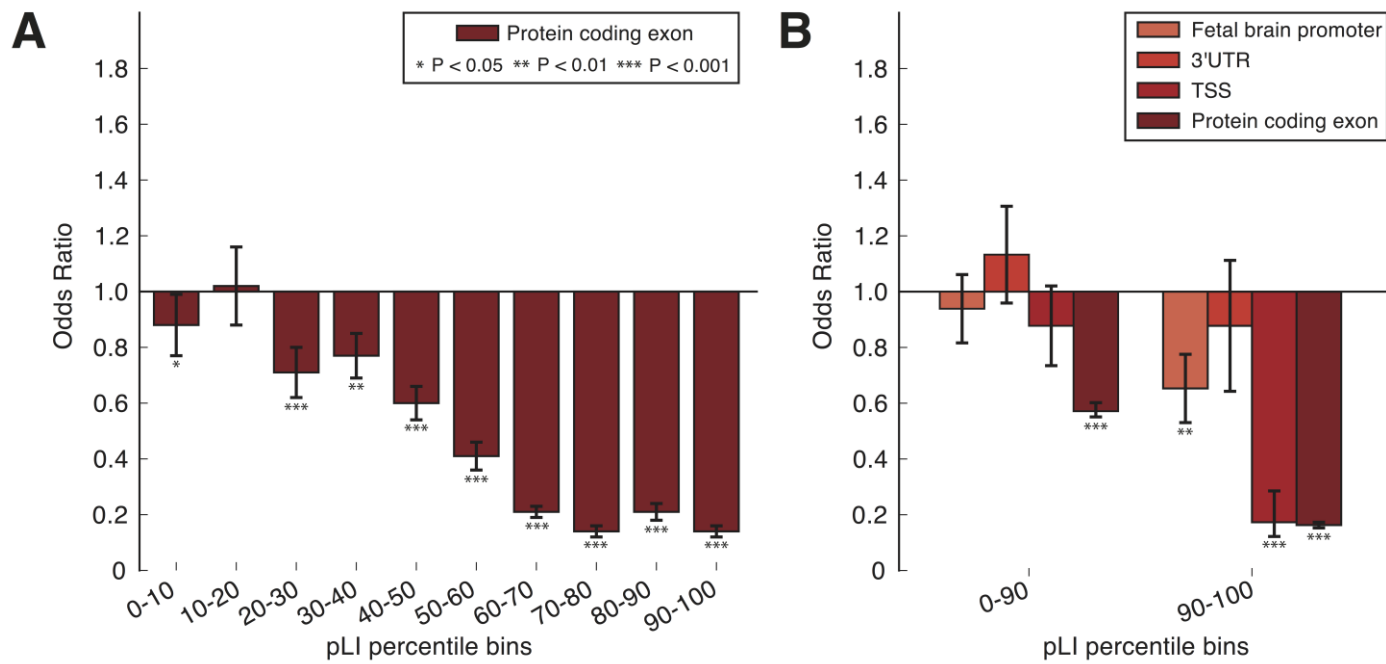

588  
589

**Fig. S6**

590 Patterns of deletion intolerance in the 1000 genomes phase 3 SV call set were very similar to those observed in this study (see Fig. 1).  
 591 (A) Depletion of deletions within exons correlated with a SNP-based measure of gene loss-of-function intolerance (pLI) from the  
 592 Exome Aggregation Consortium. (B) Promoters, Transcription Start Sites and UTRs showed the strongest deletion depletion for  
 593 variant intolerant genes (pLI >90<sup>th</sup> percentile).

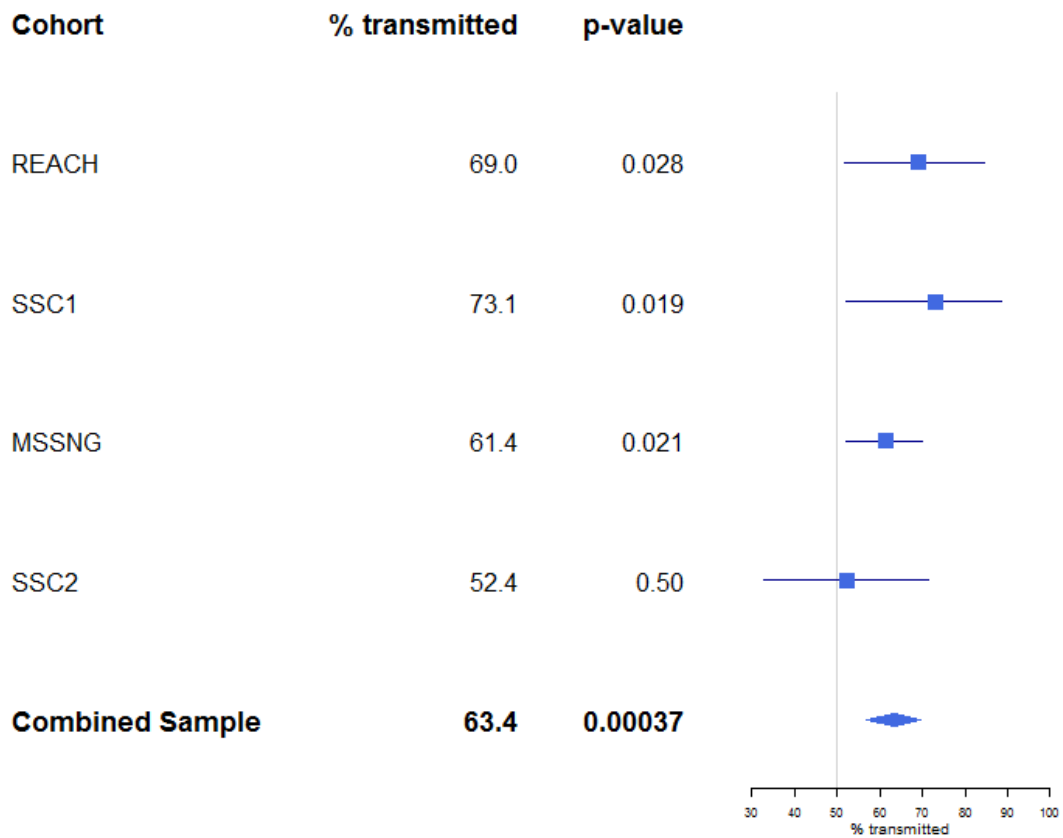

594

595 **Fig. S7**

596 Forest plot displaying the effect size (% transmitted) and 95% confidence intervals for  
 597 each of the four cohorts that were included in the study, including the two discovery  
 598 sample cohorts (REACH and SSC1), the two replication sample cohorts (MSSNG and  
 599 SSC2) and combined sample (discovery + replication). For detailed information see **table**  
 600 **S6**.

601

602



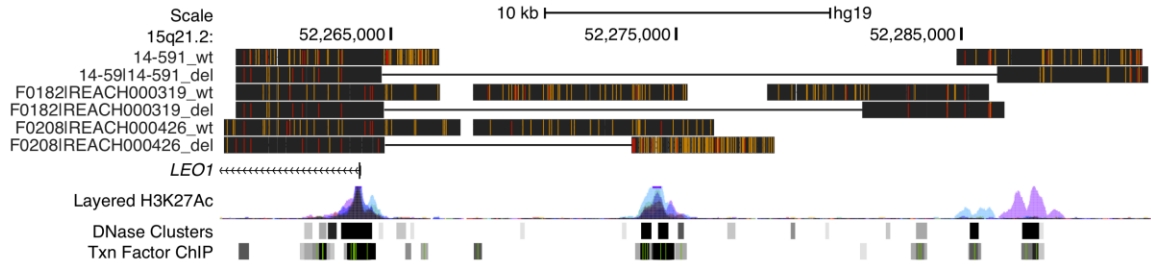

603

604 **Fig. S8**

605 UCSC genome browser image showing BLAT alignments of Oxford Nanopore long read  
 606 sequences for three heterozygote deletions with corresponding wild type sequences. The  
 607 first two deletions are private to families 14-59 and F0182, and the third deletion is a  
 608 common polymorphism present in multiple families (an individual from F0208 was  
 609 selected for sequencing). Black bars show alignments with yellow lines indicating indels  
 610 and red lines SNPs. Wild type (wt) consensus contigs are shown within the breakpoint of  
 611 the deletion. Deletion (del) contigs mapping either side of the breakpoints are linked with  
 612 horizontal lines. Layered H3K27Ac = Histone 3 lysine 27 acetylation (an active promoter  
 613 associated mark) in seven cell types from ENCODE (GM12878, H1-hESC, HSMM,  
 614 HUVEC, K562, NHEK, and NHLF). DNase clusters = DNaseI Hypersensitivity Clusters  
 615 in 125 cell types from ENCODE (V3). Txn Factor CHIP = Transcription Factor ChIP-seq  
 616 (161 factors) from ENCODE with Factorbook Motifs (green).

617

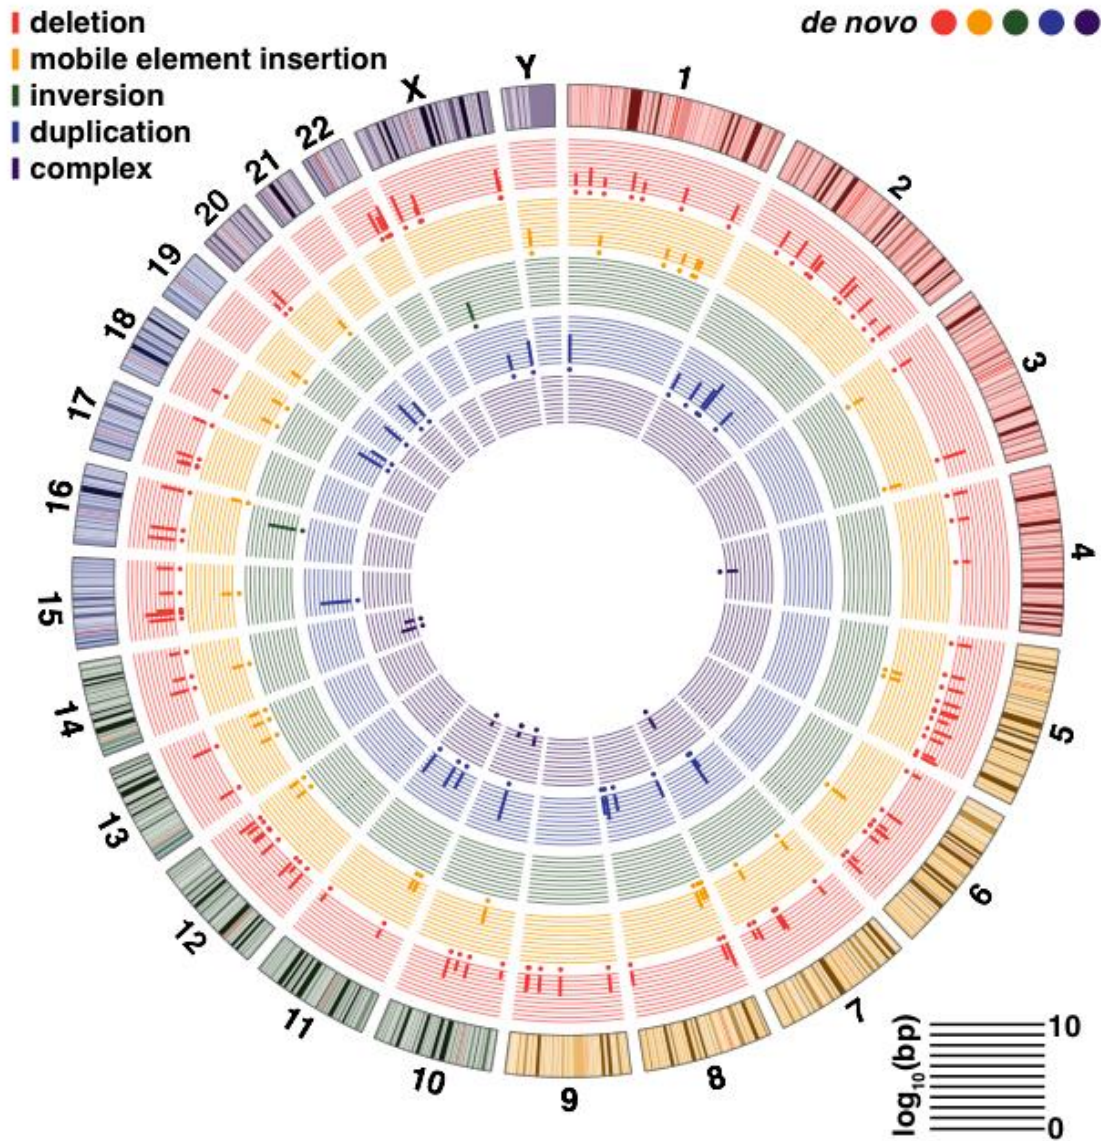

618

619 **Fig. S9. *De novo* structural variation in 1,510 children**

620 Circos plot of *de novo* variants with concentric circles representing (from outermost to  
 621 inner): ideogram of the human genome with colored karyotype bands (hg19), deletions,  
 622 mobile element insertions, balanced inversions, tandem duplications, complex structural  
 623 variants. Circles indicate the location of *de novo* SVs, and their colors match the five SV  
 624 types. Bars represent the  $\log_{10}$  SV length of the *de novo* variants.

625

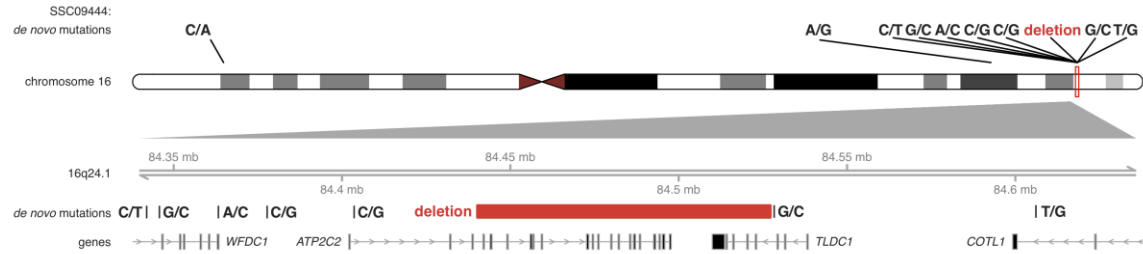

626  
627  
628  
629  
630  
631  
632  
633  
634  
635

**Fig. S10**

One example of a complex mutation cluster are shown in the control individual from the SSC, SSC09444 (alternate ID: 13874.s1). The 300kb zoomed in locus below the ideogram shows the positions of *de novo* mutations relative to each other, an 82.3kb deletion is clustered with six SNVs upstream and two downstream of it. Gene tracks below the mutation show the longest transcript of each gene within the locus, with arrows indicating the strand and bars indicating the exons of genes.

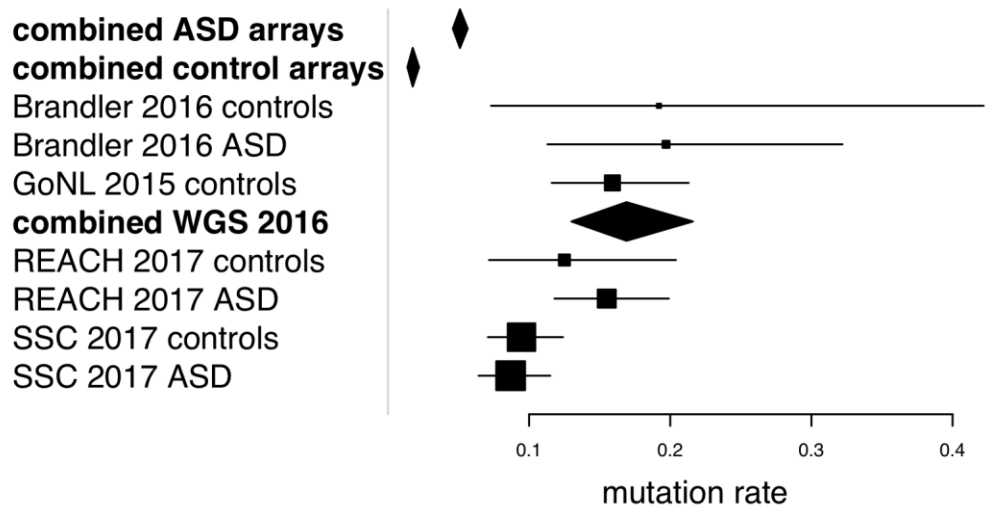

636

637 **Fig. S11**

638 Forest plot of the *de novo* mutation rate in the two cohorts from the present study  
 639 (REACH 2017 and SSC1 2017) compared to previous whole genome sequencing and  
 640 microarray studies.

# REACH000236

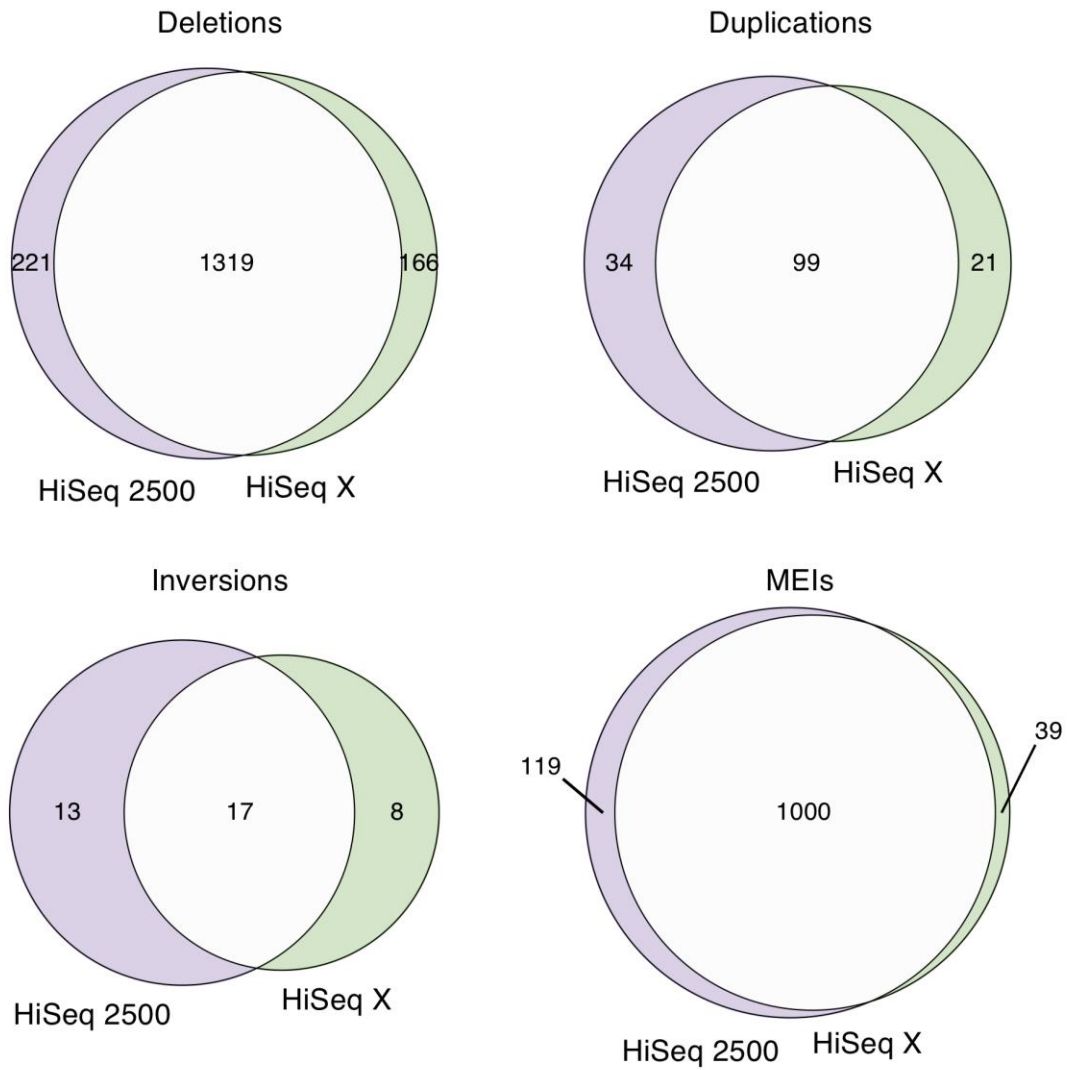

641  
642  
643  
644  
645  
646  
647

## Fig. S12

Overlap between SV calls made from one sample sequenced on two platforms  
Sample REACH000236 was sequenced at 43X coverage on both the Illumina HiSeq 2500 with 100bp reads and on the Illumina HiSeq X with 150bp reads. Venn diagrams highlight the overlap for each SV type.

|     |                                                                                              |
|-----|----------------------------------------------------------------------------------------------|
| 648 | <b>table S1 (separate file)</b>                                                              |
| 649 | Information on samples used in this study                                                    |
| 650 |                                                                                              |
| 651 | <b>table S2 (separate file)</b>                                                              |
| 652 | Descriptive statistics of the SV callset                                                     |
| 653 |                                                                                              |
| 654 | <b>table S3 (separate file)</b>                                                              |
| 655 | False Discovery rate of copy number variants across size ranges and filters                  |
| 656 |                                                                                              |
| 657 | <b>table S4 (separate file)</b>                                                              |
| 658 | Enrichment of known autism genes across pLI bins                                             |
| 659 |                                                                                              |
| 660 | <b>table S5 (separate file)</b>                                                              |
| 661 | Selection of target functional categories based on SV intolerance                            |
| 662 |                                                                                              |
| 663 | <b>table S6 (separate file)</b>                                                              |
| 664 | Group-wise Transmission/Disequilibrium Test (TDT) results                                    |
| 665 |                                                                                              |
| 666 | <b>table S7 (separate file)</b>                                                              |
| 667 | SVs detected in the target functional categories in this study                               |
| 668 |                                                                                              |
| 669 | <b>table S8 (separate file)</b>                                                              |
| 670 | Expression of <i>LEO1</i> and <i>MAPK6</i> in fibroblast cell lines from CRE-SV carriers and |
| 671 | controls                                                                                     |
| 672 |                                                                                              |
| 673 | <b>table S9 (separate file)</b>                                                              |
| 674 | <i>De novo</i> SVs detected in the discovery sample                                          |
| 675 |                                                                                              |
| 676 | <b>table S10 (separate file)</b>                                                             |
| 677 | Complex Mutation Clusters                                                                    |
| 678 |                                                                                              |
| 679 | <b>table S11 (separate file)</b>                                                             |
| 680 | Known pathogenic SVs that were detected in the discovery sample                              |
